# Supplementary material
Source: MDPI journal article supplement (https://www.mdpi.com/1424-2818/16/1/66)
Supplement: s1 [file s1]

# Supplementary Materials

**Table S1.** Pearson correlation coefficients between the analyzed chemical and biological parameters along the studied Arenosol (0–200 cm depth) in a Scots pine stand.

| Variable                    | Depth (cm) | pH <sub>CaCl2</sub> | STN (g kg <sup>-1</sup> ) | STC (g kg <sup>-1</sup> ) | C:N    | SOC (g kg <sup>-1</sup> ) | Fungi sequences | MBC (µg C g <sup>-1</sup> ) | MBN (µg N g <sup>-1</sup> ) |
|-----------------------------|------------|---------------------|---------------------------|---------------------------|--------|---------------------------|-----------------|-----------------------------|-----------------------------|
| Depth (cm)                  | 1          | 0.270               | -0.589                    | -0.565                    | 0.626  | -0.581                    | 0.095           | -0.907                      | -0.922                      |
| pH <sub>CaCl2</sub>         | —          | 1                   | -0.266                    | -0.752                    | 0.039  | -0.754                    | -0.003          | -0.335                      | -0.353                      |
| STN (g kg <sup>-1</sup> )   | —          | —                   | 1                         | 0.560                     | -0.520 | 0.572                     | 0.165           | 0.532                       | 0.471                       |
| STC (g kg <sup>-1</sup> )   | —          | —                   | —                         | 1                         | -0.210 | 0.991                     | 0.106           | 0.553                       | 0.546                       |
| C:N                         | —          | —                   | —                         | —                         | 1      | -0.221                    | -0.136          | -0.474                      | -0.474                      |
| SOC (g kg <sup>-1</sup> )   | —          | —                   | —                         | —                         | —      | 1                         | 0.063           | 0.579                       | 0.565                       |
| Fungi sequences             | —          | —                   | —                         | —                         | —      | —                         | 1               | -0.278                      | -0.282                      |
| MBC (µg C g <sup>-1</sup> ) | —          | —                   | —                         | —                         | —      | —                         | —               | 1                           | 0.985                       |
| MBN (µg N g <sup>-1</sup> ) | —          | —                   | —                         | —                         | —      | —                         | —               | —                           | 1                           |

Notes: 0.8–1.0—very strong correlation, 0.6–0.8—strong correlation, and 0.3–0.6—moderate correlation.  $p < 0.01$ . STN – soil total nitrogen, STC – soil total carbon, C:N – carbon and nitrogen ratio, SOC – soil organic carbon, MBC – soil microbial biomass carbon, MBN – soil microbial biomass nitrogen.

**Table S2.** p values of soil microbial biomass carbon (MBC) and soil microbial biomass nitrogen (MBN) statistical analysis using Fisher's LSD test.

| MBC              |                 |                |
|------------------|-----------------|----------------|
| Soil depth (cm)  | Soil depth (cm) | <i>p-value</i> |
| 0-5              | 10-15           | 0.050          |
| 0-5              | 20-25           | 0.013          |
| 0-5              | 50-55           | 0.000          |
| 0-5              | 100-105         | 0.000          |
| 0-5              | 150-155         | 0.000          |
| 0-5              | 195-200         | 0.000          |
| 10-15            | 20-25           | 0.493          |
| 10-15            | 50-55           | 0.021          |
| 10-15            | 100-105         | 0.000          |
| 10-15            | 150-155         | 0.000          |
| 10-15            | 195-200         | 0.000          |
| 20-25            | 50-55           | 0.080          |
| 20-25            | 100-105         | 0.000          |
| 20-25            | 150-155         | 0.000          |
| 20-25            | 195-200         | 0.000          |
| 50-55            | 100-105         | 0.001          |
| 50-55            | 150-155         | 0.000          |
| 50-55            | 195-200         | 0.000          |
| 100-105          | 150-155         | 0.376          |
| 100-105          | 195-200         | 0.376          |
| 150-155          | 195-200         | 1.000          |
| F-ratio = 31.892 |                 |                |

| MBN              |                 |                |
|------------------|-----------------|----------------|
| Soil depth (cm)  | Soil depth (cm) | <i>p-value</i> |
| 0-5              | 10-15           | 0.553          |
| 0-5              | 20-25           | 0.112          |
| 0-5              | 50-55           | 0.005          |
| 0-5              | 100-105         | 0.000          |
| 0-5              | 150-155         | 0.000          |
| 0-5              | 195-200         | 0.000          |
| 10-15            | 20-25           | 0.294          |
| 10-15            | 50-55           | 0.018          |
| 10-15            | 100-105         | 0.000          |
| 10-15            | 150-155         | 0.000          |
| 10-15            | 195-200         | 0.000          |
| 20-25            | 50-55           | 0.132          |
| 20-25            | 100-105         | 0.000          |
| 20-25            | 150-155         | 0.000          |
| 20-25            | 195-200         | 0.000          |
| 50-55            | 100-105         | 0.001          |
| 50-55            | 150-155         | 0.000          |
| 50-55            | 195-200         | 0.000          |
| 100-105          | 150-155         | 0.106          |
| 100-105          | 195-200         | 0.106          |
| 150-155          | 195-200         | 1.000          |
| F-ratio = 34.933 |                 |                |

**Table S3.** p values of soil total nitrogen, soil total carbon, soil organic carbon, soil inorganic carbon, and pH based on Duncan's multiple range test.

| Soil depth<br>(cm) | Soil depth<br>(cm) | STN            | STC            | SOC            | SIC            | pH <sub>CaCl2</sub> |
|--------------------|--------------------|----------------|----------------|----------------|----------------|---------------------|
|                    |                    | <i>p-value</i> | <i>p-value</i> | <i>p-value</i> | <i>p-value</i> | <i>p-value</i>      |
| 10-15              | 20-25              | 0.1817         | 0.0000         | 0.0000         | 0.8686         | 0.1117              |
| 10-15              | 50-55              | 0.0312         | 0.0000         | 0.0000         | 0.3691         | 0.0913              |
| 10-15              | 100-105            | 0.0028         | 0.0000         | 0.0000         | 0.2150         | 0.0472              |
| 10-15              | 150-155            | 0.0016         | 0.0000         | 0.0000         | 0.9340         | 0.1048              |
| 10-15              | 195-200            | 0.0009         | 0.0000         | 0.0000         | 0.6411         | 0.1556              |
| 100-105            | 20-25              | 0.0498         | 0.0007         | 0.0015         | 0.2630         | 0.5890              |
| 100-105            | 50-55              | 0.2628         | 0.4627         | 0.6460         | 0.6796         | 0.6777              |
| 100-105            | 150-155            | 0.7720         | 0.4480         | 0.7324         | 0.1961         | 0.5913              |
| 100-105            | 195-200            | 0.5889         | 0.3768         | 0.4919         | 0.3944         | 0.4187              |
| 150-155            | 20-25              | 0.0317         | 0.0035         | 0.0030         | 0.8155         | 0.9904              |
| 150-155            | 50-55              | 0.1858         | 0.9430         | 0.8834         | 0.3409         | 0.8735              |
| 150-155            | 195-200            | 0.7752         | 0.8676         | 0.6961         | 0.5990         | 0.7530              |
| 195-200            | 20-25              | 0.0194         | 0.0038         | 0.0050         | 0.7409         | 0.7569              |
| 195-200            | 50-55              | 0.1256         | 0.8228         | 0.7881         | 0.6204         | 0.6568              |
| 20-25              | 50-55              | 0.3167         | 0.0036         | 0.0035         | 0.4384         | 0.8760              |
| 0-5                | 10-15              | -              | -              | -              | -              | 0.0571              |
| 0-5                | 20-25              | -              | -              | -              | -              | 0.0029              |
| 0-5                | 50-55              | -              | -              | -              | -              | 0.0024              |
| 0-5                | 100-105            | -              | -              | -              | -              | 0.0012              |
| 0-5                | 150-155            | -              | -              | -              | -              | 0.0026              |
| 0-5                | 195-200            | -              | -              | -              | -              | 0.0040              |

Notes: STN – soil total nitrogen; STC – soil total carbon; SOC – soil organic carbon; SIC – soil mineral (inorganic) carbon.
